# Supplementary material
Source: Springer Nature journal article supplement (https://www.springermedizin.de/resource/supplementary/12967_2011_976_MOESM7_ESM.pdf/9577242)

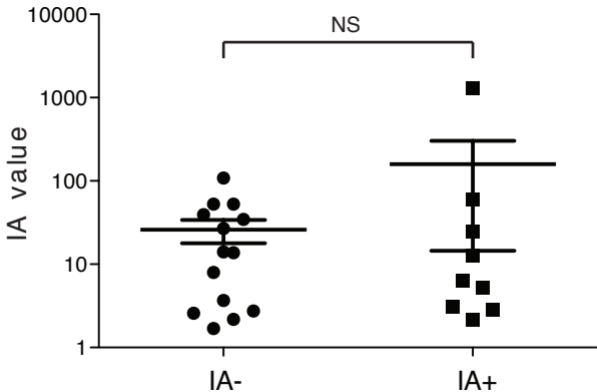

Supplement: MOESM7 [file 9577242]
